# Supplementary material for: A neural circuit encoding mating states tunes defensive behavior in Drosophila
Source: PubMed Central journal article supplement (PMC7414864; doi:10.1038/s41467-020-17771-8), 2020-08-07
Supplement: 41467_2020_17771_MOESM1_ESM.pdf [file 41467_2020_17771_MOESM1_ESM.pdf]

**A Neural Circuit Encoding Mating States Tunes Defensive Behavior in *Drosophila***

Liu et al.

**Supplementary Information**

Supplementary Figures and Legends

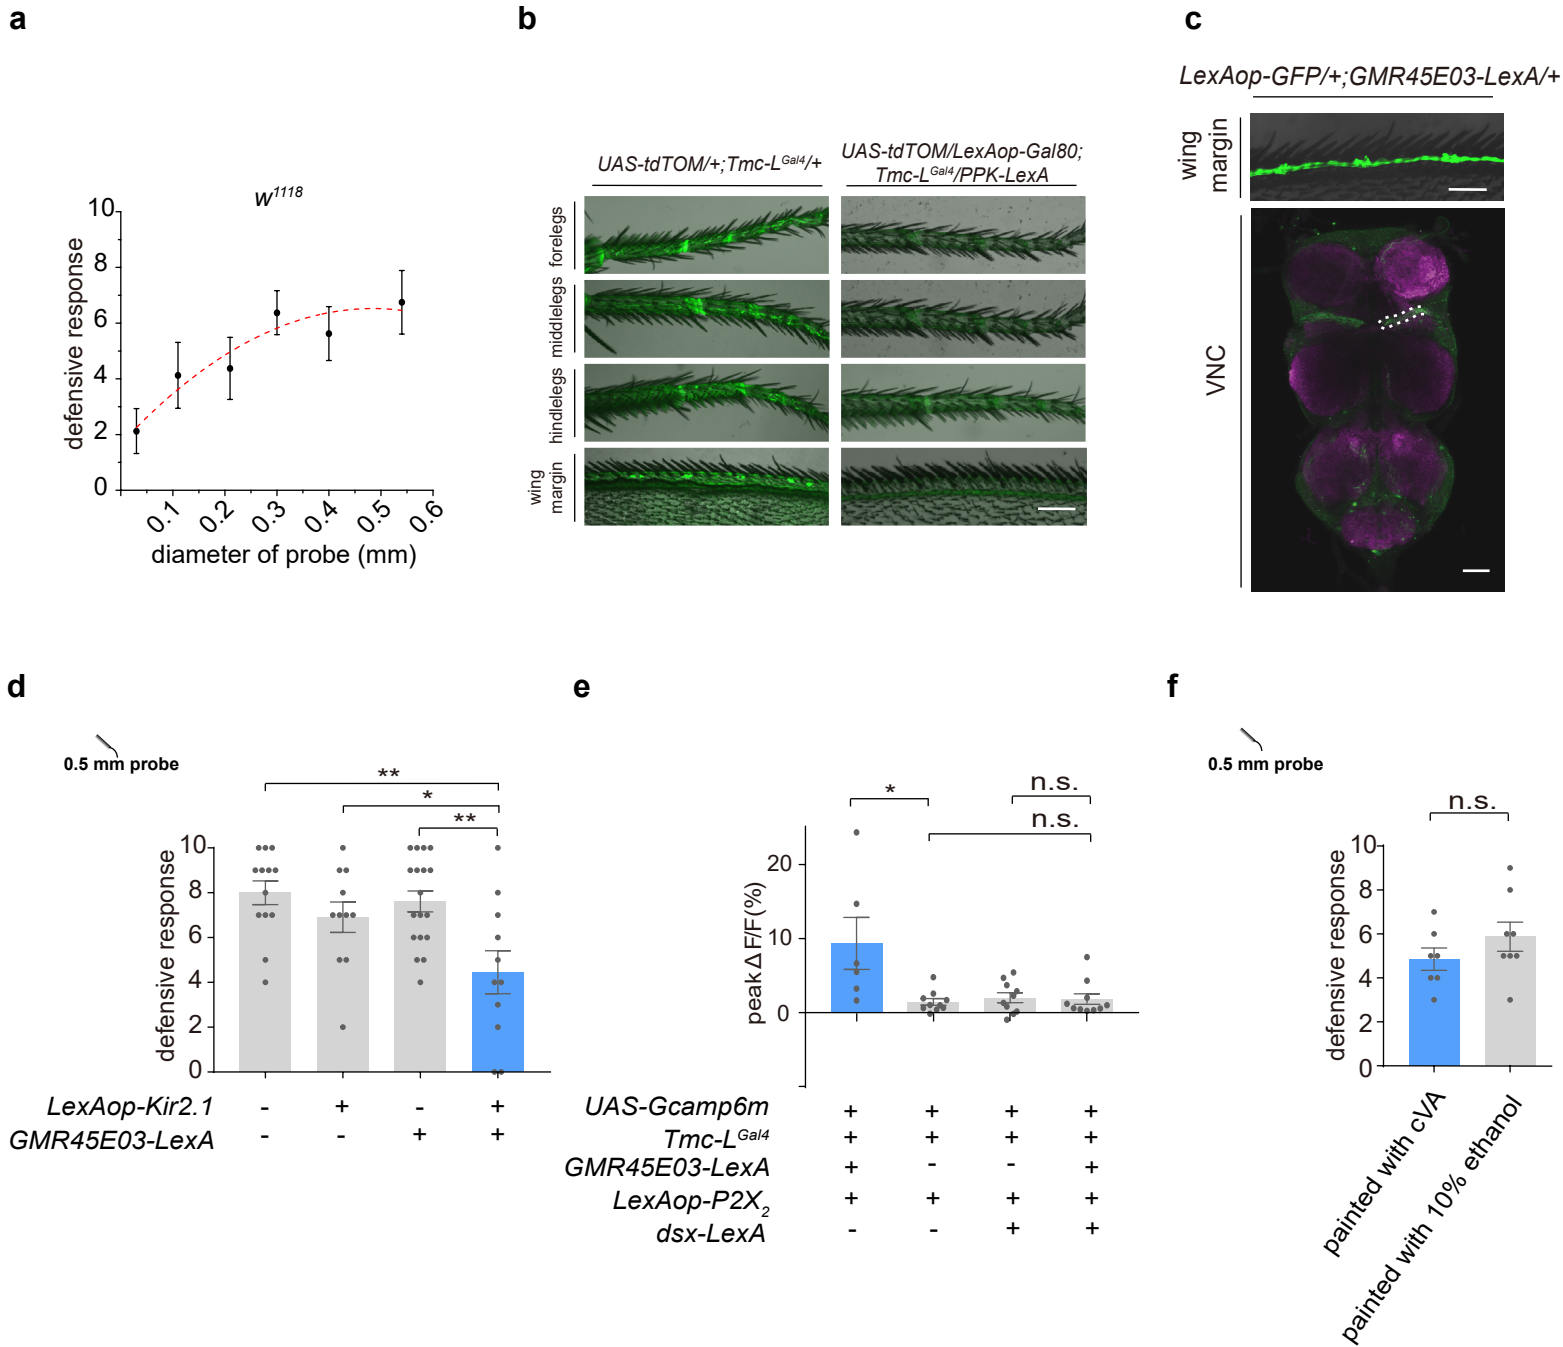

**Supplementary Fig. 1** Supplied experiments to Fig.1. **(a)** Defensive response increased with the diameter of the probe.  $n=8$  for each group. **(b)** Peripheral expression of Tmc-L (left). Peripheral expression of Tmc-L was eliminated by *PPK-lexA>LexAop-Gal80* (right). Scale bar represented 50  $\mu$ m. **(c)** Immunofluorescence of *GMR45E03-LexA* (green) and NC82 (magenta) in the wing margin (above) and VNC (below). This driver line labeled mechanoreceptors on the wing margin which projected to accessory mesothoracic ganglion (highlighted with white dashed line). Scale bar represented 50  $\mu$ m. **(d)** Blocking *GMR45E03-LexA* neurons' activity with Kir2.1 largely reduced the defensive response against wing margin touch.  $n=13, 11, 18$  and  $11$  for each group.  $**p < 0.01$ ,  $*p < 0.05$ , two-tailed unpaired  $t$  tests. **(e)** Calcium response of CTNs' cell bodies in additional control groups.  $n=5, 10, 10$  and  $10$  for each group.  $*p < 0.05$ ,  $p > 0.05$  (n.s.), two-tailed Mann-Whitney nonparametric test. **(f)** Defensive response score of virgins painted with cVA and 10% ethanol stimulated by 0.5mm probe.  $n=7$  and  $8$  for each group.  $p > 0.05$  (n.s.), two-tailed unpaired  $t$  tests. Error bars indicate mean  $\pm$  SEM, n.s., not significant. Source data are provided as a Source Data file.

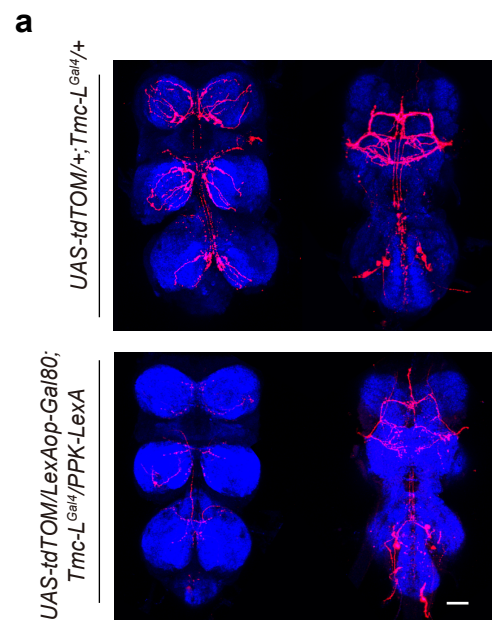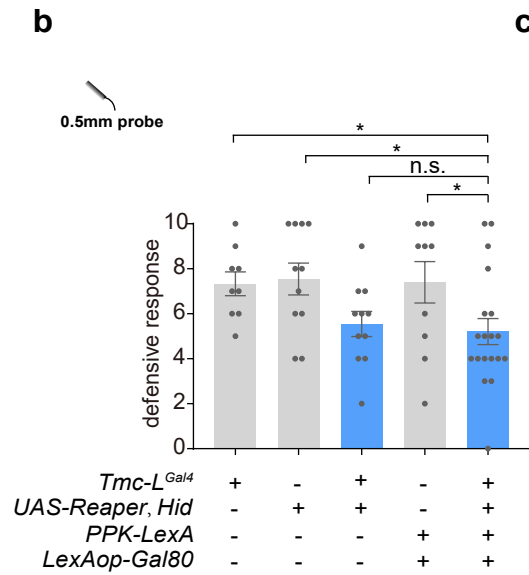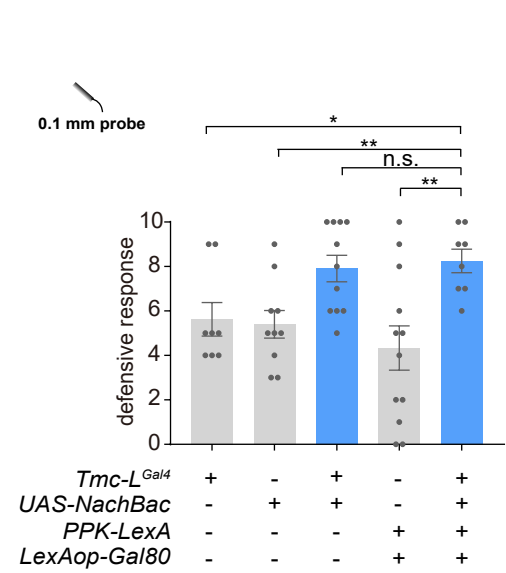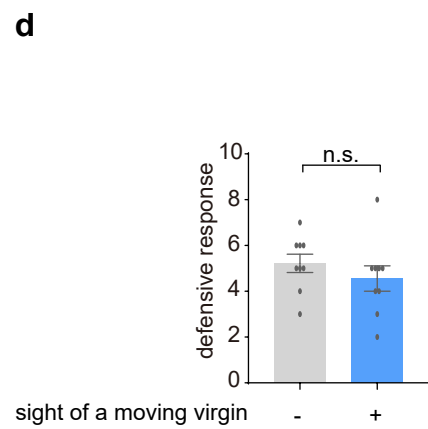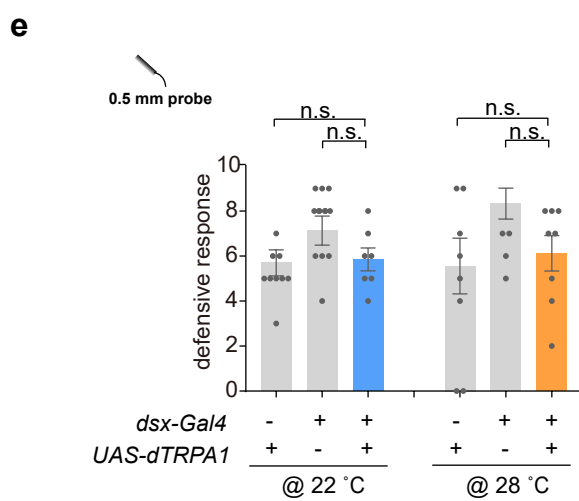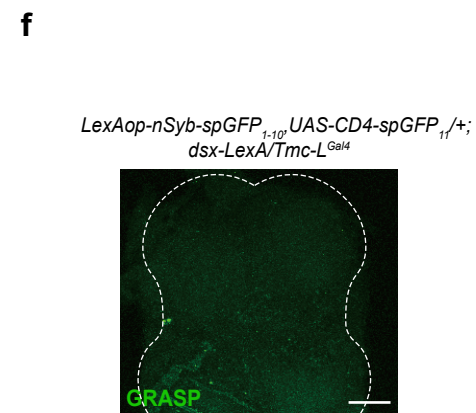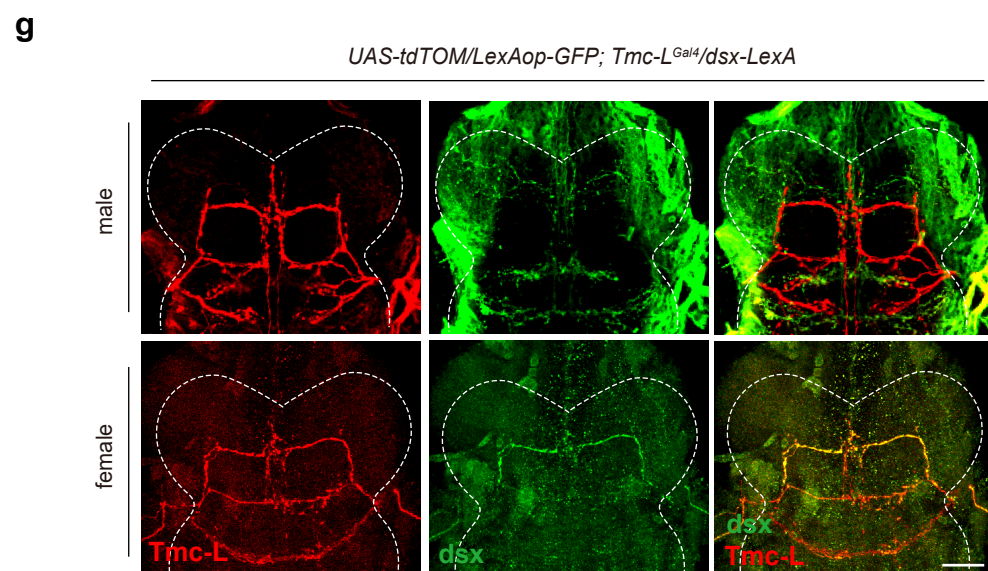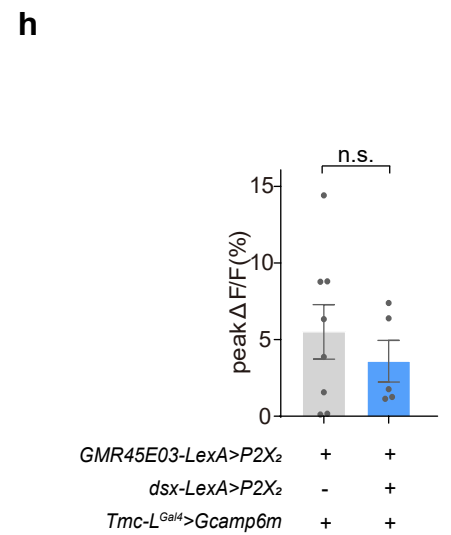

**Supplementary Fig. 2** CTNs' role in male flies. **(a)** Immunofluorescence of Tmc-L (red) and NC82 (blue) in the ventral and dorsal VNC in males. Below: the expression pattern of CTNs, and the peripheral projections of Tmc-L in the ventral VNC were eliminated by *PPK-Gal80*. Scale bar represented 50  $\mu\text{m}$ . **(b,c)** CTNs of males coordinated defensive response. Ablating all Tmc-L neuron or only CTNs with Reaper and Hid (b), and activating all Tmc-L neuron or only CTNs with NachBac (c).  $n=9, 11, 11, 10$  and  $19$  for each group in (b),  $n=8, 10, 11, 12$  and  $8$  for each group in (c).  $**p < 0.01$ ,  $*p < 0.05$ ,  $p > 0.05$  (n.s.), two-tailed unpaired  $t$  test. **(d)** Defensive response of males with the sight of moving virgins.  $n=9$  for each group.  $p > 0.05$  (n.s.), n.s., two-tailed unpaired  $t$  test. **(e)** Activating *dsx* neuron with dTrpA1 didn't induce significant difference of defensive response against mechanical stimuli in males.  $n=10, 14, 7, 9, 9$  and  $8$  (from left to right).  $p > 0.05$  (n.s.), two-tailed unpaired  $t$  test. **(f)** No GRASP signal was observed between *dsx* neurons and CTNs in males. White dashed line outlines the border of the mesothoracic ganglion of the VNC. Scale bar represented 50  $\mu\text{m}$ . **(g)** Co-expression of *dsx* neurons and *Tmc-L* neurons in the dorsal metathoracic ganglion of the VNC in male (upper) and female (lower). White dashed line outlines the border of the mesothoracic ganglion of the VNC. Scale bar represented 50  $\mu\text{m}$ . **(h)** Peak fluorescence changes ( $\Delta F/F_0$ ) of CTNs' cell bodies in the VNC after activating wing margin mechanosensory neurons via  $\text{P2X}_2$  in males. Activating wing margin mechanosensory neurons elicited elevated calcium signal of CTNs (left bar,  $n=8$ ). Activating wing margin mechanosensory neurons and *dsx* neurons simultaneously didn't decrease calcium signal of CTNs (right bar,  $n=5$ ).  $p > 0.05$  (n.s.), two-tailed unpaired  $t$  test. Error bars indicate mean  $\pm$  SEM, n.s., not significant. Source data are provided as a Source Data file.

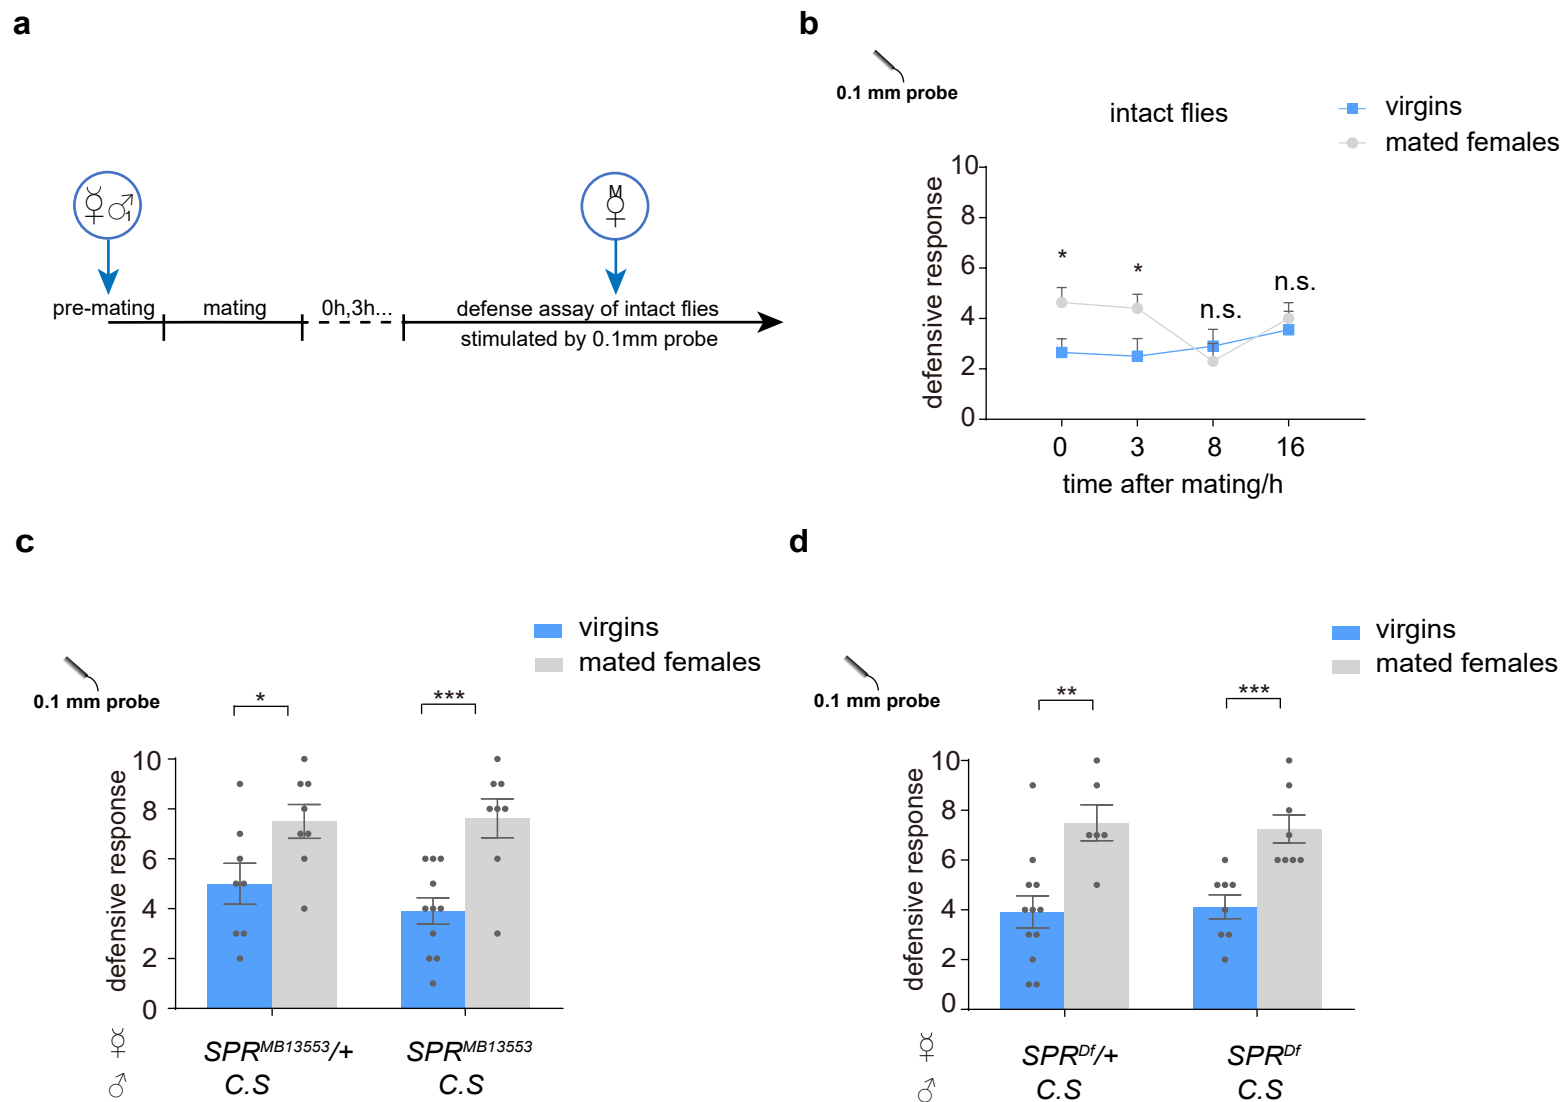

**Supplementary Fig. 3** Increased defensive response induced by mating can last for hours in intact flies, which was independent with SP. **(a)** Schematic for assays in **(b)**. Males were removed after copulation, and mated females were kept for certain hours before the defensive response assay. **(b)** The intact mated female flies exhibited a higher defensive response to mechanical stimuli on the wing margins compared to virgin females, consistent with decapitated flies (see in Fig. 3d). Matched females represented that virgins were placed solely in courtship chambers paralleled with mated females under the same preparation.  $n = 20, 10, 10$  and  $9$  for each group of matched virgins,  $n = 22, 10, 10$  and  $8$  for each group of mated virgins.  $*p < 0.05$ ,  $p > 0.05$  (n.s.), two-tailed unpaired  $t$  test. **(c, d)** Female flies of *SPR* mutant alleles, *SPR<sup>MB13553</sup>* **(c)** and *SPR<sup>Df</sup>* **(d)**, showed an increase of defensive response after mating.  $n = 8, 8, 11$  and  $8$  for each group in **(c)**,  $n = 12, 6, 8$  and  $8$  for each group in **(d)**.  $***p < 0.001$ ,  $**p < 0.01$ ,  $*p < 0.05$ , two-tailed unpaired  $t$  test. Error bars indicate mean  $\pm$  SEM, n.s., not significant. Source data are provided as a Source Data file.

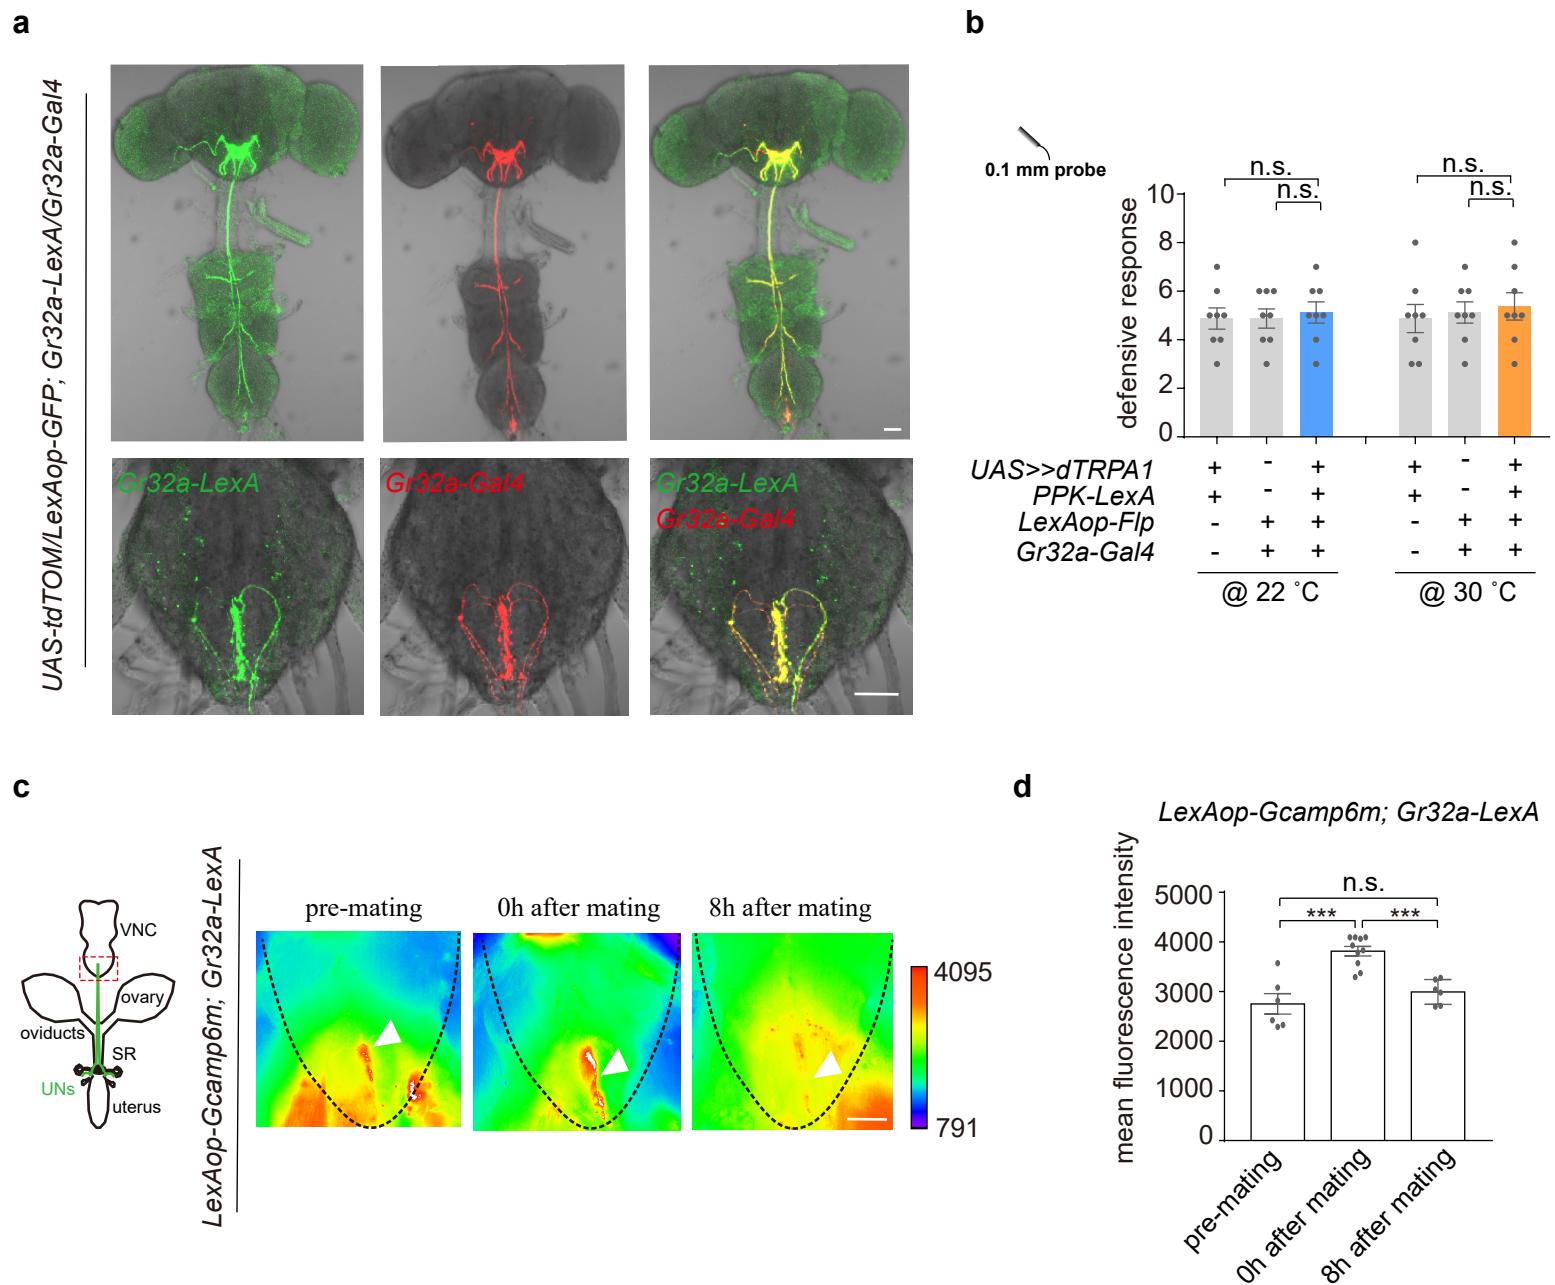

**Supplementary Fig. 4** UNs could be activated by mating to modulate defensive response, which was female-specific. **(a)** Co-expression of *Gr32a-Gal4* and *Gr32a-LexA* in the CNS (upper) and in the Abg of the VNC (lower). Scale bar represented 50  $\mu$ m (upper) and 25  $\mu$ m (lower). **(b)** Activating UNs in decapitated males at 22°C and 30°C.  $n = 8$  for each group.  $p > 0.05$  (n.s.), two-tailed unpaired  $t$  test. **(c)** Representative imaging of  $Ca^{2+}$  responses in neuronal projections of UNs in the Abg from virgins (left), newly mated (middle) and females 8h post-mating (right). Left panel: schematic showed that the region was imaged in right panels. Scale bar represented 25  $\mu$ m. **(d)** Mean fluorescence intensity of  $Ca^{2+}$  signal in neuronal projections of UNs in the Abg from virgins, newly mated and 8h post-mating females.  $n = 6, 11$  and 6 for each group. \*\*\* $p < 0.001$ ,  $p > 0.05$  (n.s.), two-tailed unpaired  $t$  test. Error bars indicate mean  $\pm$  SEM, n.s., not significant. Source data are provided as a Source Data file.

**a**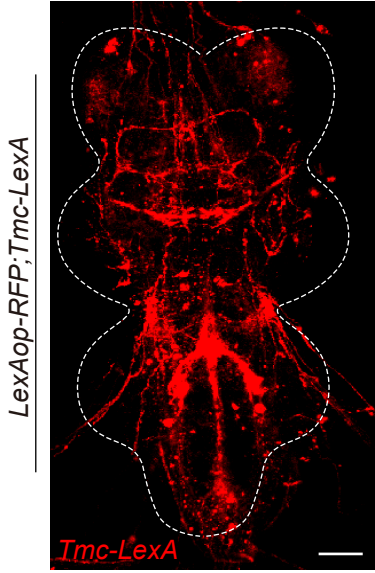**b**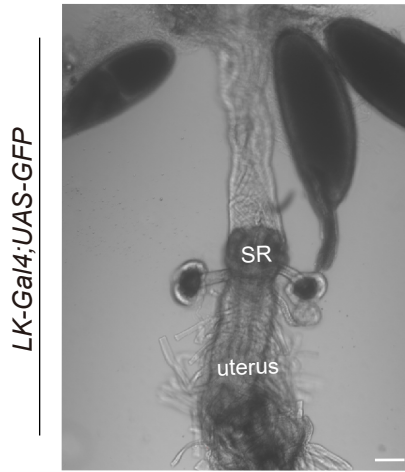**c**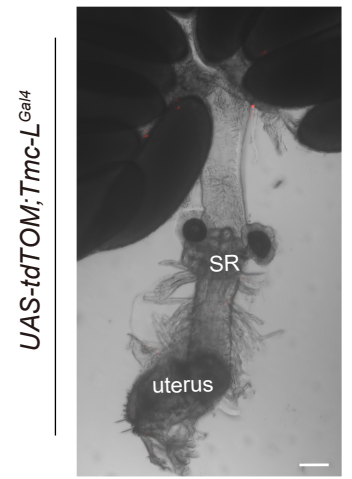

**Supplementary Fig. 5** The expression patterns of LK-Gal4 and Tmc-L<sup>Gal4</sup> in female reproductive system. **(a)** Expression patterns of *Tmc-LexA* in the VNC. Scale bar represented 50  $\mu$ m. **(b-c)** Expression patterns of *LK-Gal4* (b) and *Tmc-L<sup>Gal4</sup>* (c) in female reproductive system. Scale bar represented 50  $\mu$ m.
